# Supplementary material
Source: Springer Nature journal article supplement (https://www.springermedizin.de/resource/supplementary/13618_2012_45_MOESM4_ESM.pdf/9681036)

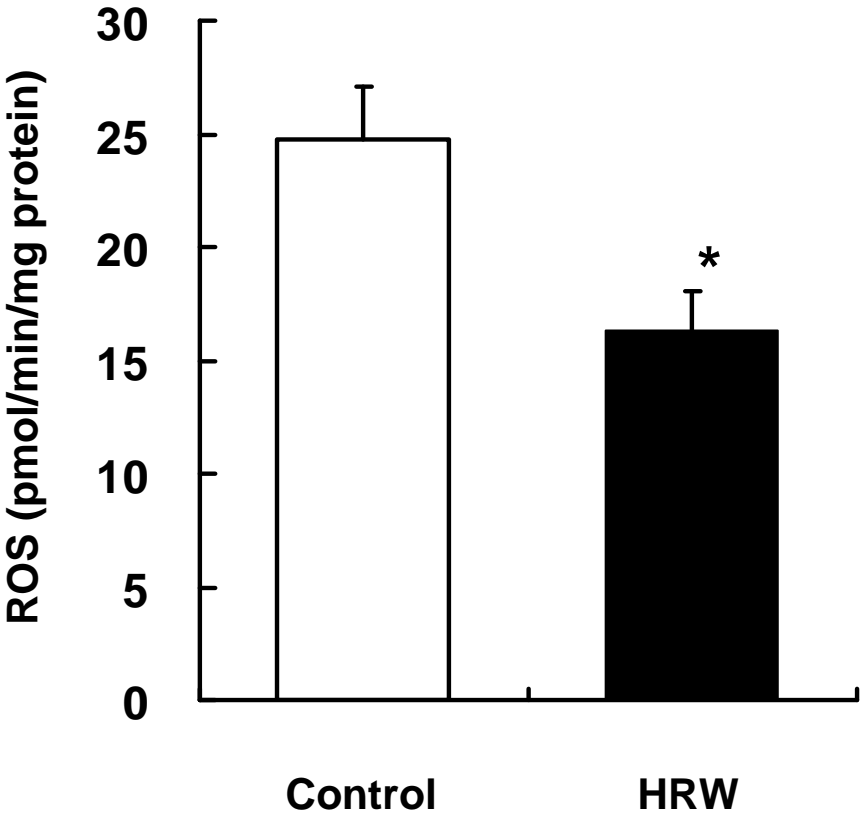

Supplement: MOESM4 [file 9681036]
